# Supplementary material for: Constructing a neural network model based on tumor-infiltrating lymphocytes (TILs) to predict the survival of hepatocellular carcinoma patients
Source: PeerJ journal article supplement (doi:10.7717/peerj.19351), 2025-04-23
Supplement: a.xlsx [file a.xlsx]

## Sheet: Sheet1
Over Survival	Dead Status	Total Cell Count	Lymphocyte Count	Stroma Count	Tumor Cell Count	Other Cell Count	Total Area	Lymphocyte Area	Stroma Area	Tumor Cell Area	Peritumoral Lymphocyte Invasion（PLS）	Tertiary Lymphoid Structures（TLS）	lymn-c	etils%	eatils%	ettils%	eatils%
535	1	33682	813	5594	27275	0	2783540	36202	409402	2337935	1	0	0.304949	2.89447	12.6892	2.41375	1.30057
1507	1	85978	7654	3242	74660	422	10942093	597558	498899	9798403	0	1	0.206486	9.29854	70.246	8.90228	5.46109
3277	0	26086	4962	1016	20108	0	2497090	283376	81097	2132616	1	1	0.312553	19.7926	83.0043	19.0217	11.3482
308	1	176750	175	14235	162340	0	18137495	16592	1447365	16673537	0	0	0.205163	0.107682	1.21443	0.0990099	0.091479
3271	0	13595	3342	493	9760	0	1381350	188449	63268	1129633	1	1	0.334403	25.5076	87.1447	24.5826	13.6424
105	1	57987	1228	6633	47419	2707	5400939	87962	755720	4306976	0	0	0.293565	2.52431	15.6214	2.11772	1.62864
3264	0	17957	2934	645	14378	0	2693594	252759	87433	2353401	1	1	0.221232	16.9478	81.9782	16.339	9.38371
2295	1	123128	9535	3893	108766	934	18035413	958570	604107	16357046	1	0	0.194504	8.05995	71.0083	7.74397	5.31493
3252	0	30891	2848	549	27494	0	2934800	1878817	53863	2693119	1	0	0.262197	9.38633	83.8387	9.21951	64.0186
148	1	48624	2	4479	44143	0	4564264	236	431547	4132480	1	0	0.1328	0.00453052	0.0446329	0.0041132	0.0051706
579	1	45486	1674	1888	41924	0	7221270	178530	326366	6716373	0	0	0.15443	3.83963	46.9961	3.68025	2.47228
3234	0	40026	1253	281	38492	0	3798441	97978	36199	3664264	1	1	0.21594	3.1526	81.6819	3.13047	2.57943
3234	0	15098	1094	404	13600	0	1491440	108205	67594	1315640	1	0	0.189526	7.44522	73.0307	7.24599	7.25507
3228	0	41546	8326	3171	30049	0	5683580	647298	444681	4591600	1	1	0.248681	21.6964	72.4189	20.0404	11.3889
2419	1	38265	2161	242	35862	0	3505565	149005	38649	3317911	1	1	0.250283	5.6834	89.9293	5.64746	4.25053
184	1	23318	131	2829	20358	0	3017788	8814	322066	2686908	0	0	0.201897	0.639367	4.42568	0.561798	0.292068
231	1	49204	49	7529	41273	353	6759325	4494	923765	5803226	0	0	0.165253	0.118581	0.646609	0.0995854	0.0664859
2985	1	87352	7250	2879	76547	676	9427054	668215	337039	8378273	1	1	0.259379	8.65186	71.5767	8.29975	7.08827
3195	0	157997	13091	2533	142373	0	15468614	1048723	333518	14086372	1	1	0.261006	8.4206	83.7878	8.2856	6.77968
476	1	16782	99	859	15753	71	1854804	9321	98667	1742586	1	0	0.225864	0.624527	10.334	0.589918	0.502533
3187	0	70186	15754	2074	52358	0	6726373	1020703	293464	5412206	1	1	0.284757	23.1296	88.3666	22.4461	15.1746
3186	0	77225	6988	2445	67792	0	8763757	500581	300772	7962402	1	1	0.258195	9.34474	74.0804	9.04888	5.71195
773	1	41701	199	1821	39679	2	3837404	14272	182868	3640069	1	0	0.235853	0.499022	9.85149	0.477207	0.371918
2914	1	28422	3273	1032	22591	1526	3768862	303709	133073	3088396	1	1	0.166665	12.6547	76.0279	11.5157	8.05837
2162	1	81603	8630	362	72611	0	8819827	628587	49220	8142020	1	1	0.21043	10.6227	95.9742	10.5756	7.12698
3153	0	80896	14383	2609	63904	0	8361619	1045831	309518	7006269	1	1	0.209699	18.3721	84.6457	17.7796	12.5075
252	1	70698	633	3895	66170	0	8579459	43940	552856	7982662	1	0	0.233079	0.947562	13.9797	0.895358	0.512154
1208	1	33087	1167	5209	26711	0	3675286	75064	560663	3039557	1	1	0.281299	4.1861	18.303	3.52707	2.0424
3139	0	37234	5470	542	31222	0	3424165	331253	46672	3046240	1	1	0.296792	14.9079	90.9847	14.6909	9.67398
3132	0	39177	5241	1212	32724	0	4604024	334576	150725	4118722	1	1	0.264188	13.8048	81.218	13.3777	7.26703
2430	1	95388	20319	2054	71018	1997	8187865	1219247	184461	6625492	1	1	0.249378	22.2462	90.8193	21.3014	14.8909
3127	0	36874	4490	1230	31154	0	4465832	345039	171599	3949193	1	1	0.286805	12.5968	78.4965	12.1766	7.7262
2319	1	178645	8045	3185	167415	0	16735573	503957	345863	15885752	1	0	0.289553	4.58509	71.6385	4.50334	3.01129
1694	1	52021	10002	6197	35822	0	4644256	579628	619625	3445002	1	1	0.269308	21.827	61.7446	19.2269	12.4805
2356	1	77283	13426	5597	58260	0	6031471	776430	544439	4710601	1	1	0.276479	18.7289	70.5777	17.3725	12.873
3083	0	205553	24506	4528	176519	0	18371416	1625995	482887	1626533	1	1	0.250046	12.1905	84.4045	11.922	8.85068
3082	0	181090	32387	8964	139739	0	2025860	2312249	1103613	16839997	0	1	0.23462	18.8159	78.3222	17.8845	114.137
3082	0	235569	15786	1520	218263	0	28021881	1078039	181218	26762624	1	1	0.283028	6.74474	91.2169	6.70122	3.84713
3082	0	188828	23442	11123	154263	0	21523724	1280396	1276411	18966916	1	1	0.302748	13.1915	67.82	12.4145	5.94877
3081	0	53143	3381	2644	47118	0	7696494	247462	336795	7112236	1	1	0.23458	6.69518	56.1162	6.36208	3.21526
3058	0	174227	20012	4704	149511	0	20882101	1461462	674308	18746330	1	1	0.227533	11.8049	80.9678	11.4862	6.99863
1043	1	36107	426	1139	34542	0	3604185	27268	107391	3469524	1	0	0.207623	1.21826	27.2204	1.17983	0.756565
324	1	33596	1207	5562	26827	0	3550407	73917	601165	2875325	1	0	0.240325	4.30549	17.8313	3.59269	2.08193
3039	0	117768	24364	6232	87172	0	12803596	1396122	686096	10721378	1	1	0.277078	21.8441	79.6313	20.6881	10.9041
3033	0	115051	6332	1325	107394	0	15103366	440931	160205	14502229	1	1	0.237878	5.56777	82.6956	5.50365	2.91942
320	1	73977	336	3207	70434	0	6402316	41260	393119	5967936	0	0	0.100721	0.474777	9.48349	0.454195	0.644454
3004	0	97855	6061	4557	87237	0	12999433	479521	665451	11854461	1	1	0.217254	6.49639	57.0823	6.19386	3.68878
465	1	11710	323	1903	9484	0	1558877	41087	247235	1270554	0	0	0.124216	3.29357	14.5103	2.75833	2.63568
2999	0	154013	9426	3260	141327	0	13641592	617623	312003	12711965	1	1	0.259004	6.25261	74.3024	6.12026	4.5275
156	1	64188	1294	9551	53343	0	9347418	151585	1424998	7770835	0	0	0.108356	2.36836	11.9318	2.01595	1.62168
740	1	30581	29	2929	27623	0	3727093	3154	300644	3423294	0	0	0.1217	0.104875	0.980392	0.0948301	0.0846236
2964	0	104624	5097	2378	97149	0	17981295	598607	408371	16974316	1	1	0.159469	4.98504	68.1873	4.87173	3.32905
1184	1	23678	1685	491	21502	0	2756341	170547	56447	2529346	0	1	0.216488	7.267	77.4357	7.11631	6.18744
2962	0	90068	2358	1097	86613	0	9628216	185272	162351	9280592	1	1	0.255441	2.6503	68.2489	2.61802	1.92426
215	1	26881	129	1307	25445	0	2650874	12216	154974	2483683	0	0	0.225832	0.504419	8.98329	0.479893	0.460829
1782	1	60354	406	1282	58666	0	8774816	48393	178572	8547850	0	0	0.155139	0.687297	24.0521	0.672698	0.551499
830	1	58308	1130	3923	53255	0	7568400	152049	524452	6891898	1	0	0.159623	2.07778	22.363	1.93798	2.009
2944	0	100310	554	944	98812	0	9030376	32316	111592	8886467	1	1	0.302977	0.557535	36.9826	0.552288	0.357859
2936	0	99999	7007	3356	89636	0	10231080	455835	350964	9424280	1	1	0.305138	7.2504	67.6156	7.00707	4.45539
2931	0	73957	6377	2811	64769	0	7785319	426768	301927	7056623	1	1	0.276362	8.96326	69.4057	8.62258	5.4817
2915	0	41560	5449	541	35570	0	5769493	537956	78601	5152935	1	1	0.170230757937236	13.2841	90.9683	13.1112	9.32415
2914	0	19793	4482	1165	14146	0	2307428	322867	130365	1854195	1	1	0.233119299	24.0606	79.3696	22.6444	13.9925
2878	0	48946	9311	607	39028	0	5043682	527571	71678	4444432	1	1	0.311057	19.2619	93.8798	19.023	10.46
828	1	15631	743	1782	13106	0	2188490	50537	183447	1954505	0	0	0.254343	5.36501	29.4257	4.75337	2.30922
1404	1	82927	4411	993	77523	0	10101825	336969	125673	9639183	1	1	0.229453	5.3836	81.6247	5.31914	3.33572
798	1	40526	886	2576	37064	0	6244446	73305	346960	5824181	1	0	0.270916	2.33465	25.5921	2.18625	1.17392
2803	0	11369	1856	312	9201	0	1932832	225847	45444	1661540	1	1	0.149741	16.7857	85.6089	16.3251	11.6848
774	1	39247	2215	3084	33948	0	4512138	153000	389895	3969241	1	1	0.319775	6.12504	41.8003	5.64374	3.39085
2794	0	60214	3248	914	56052	0	5568406	227863	125618	5214924	1	1	0.222872	5.47723	78.0394	5.39409	4.09207
540	1	71234	3443	12029	55762	0	8860943	278368	1245848	7336726	0	0	0.199293	5.81539	22.2531	4.83337	3.14152
1029	1	67821	3288	1918	62615	0	5998351	148795	245515	5604041	1	0	0.293084	4.98915	63.1579	4.84806	2.4806
537	1	64947	719	4567	59661	0	9422267	73360	687320	8661587	1	0	0.176419	1.19079	13.602	1.10706	0.778581
2748	0	28642	2278	1514	24850	0	4035147	195509	255466	3584172	1	1	0.185335	8.39723	60.0738	7.95336	4.84515
2739	0	64036	5482	3725	54829	0	5302914	319301	376627	4606985	1	1	0.273643	9.08955	59.5417	8.56081	6.02124
954	1	85311	1407	3212	80692	0	11640953	122392	572420	10946140	1	0	0.169764	1.71378	30.4611	1.64926	1.05139
1296	1	121991	4107	2248	107628	8008	18197522	424940	415202	16348022	1	0	0.168556	3.67566	64.6263	3.36664	2.33515
2282	1	108258	4056	1263	100892	2047	13727915	364973	211207	12896405	1	1	0.170908	3.86477	76.2549	3.74661	2.65862
2695	0	37620	2107	1883	33630	0	5423592	184634	256429	4982528	1	1	0.20316	5.89585	52.807	5.60074	3.40428
2692	0	87753	4830	2020	80903	0	8824856	332495	220927	8271434	1	1	0.230821	5.63377	70.5109	5.50409	3.76771
2685	0	75528	7881	2785	64862	0	7822303	549718	358969	6913616	1	1	0.281034	10.834	73.889	10.4345	7.02757
2669	0	5829	920	150	4759	0	991690	111846	23872	855971	1	1	0.158019	16.2	85.9813	15.7832	11.2783
2668	0	26015	1653	718	23486	158	3344662	111124	101850	3117174	1	1	0.259792	6.57544	69.7174	6.35403	3.32243
2329	1	296250	22713	6728	266632	177	34892868	1839943	1065625	31968007	1	1	0.176525	7.8498	77.1475	7.66684	5.27312
861	1	89806	2107	3336	84205	158	12404270	187724	582782	11615046	0	0	0.163044	2.44114	38.7103	2.34617	1.51338
2624	0	30180	3926	1281	24973	0	2595156	223102	115987	2256065	1	1	0.276113	13.5852	75.3985	13.0086	8.59686
2611	0	25724	1036	843	23845	0	3438346	80901	126796	3230648	1	1	0.214449	4.16382	55.1357	4.02737	2.3529
2606	0	33370	3135	1249	28986	0	4015960	242025	152389	3621546	1	1	0.227213	9.75997	71.51	9.39467	6.02658
2604	0	45077	5960	1014	38103	0	5009516	465868	126456	4417191	1	1	0.217593	13.5261	85.4603	13.2218	9.29966
405	1	15542	152	448	14938	4	1973328	12901	54778	1905208	0	0	0.157913	1.00729	25.3333	0.977995	0.653769
984	1	62355	646	2391	59305	13	6202821	49937	230219	5921483	1	1	0.176796	1.07755	21.271	1.036	0.805069
2592	0	28752	3435	996	24321	0	4177349	338236	118931	3720181	1	1	0.141236	12.3757	77.522	11.947	8.09691
672	1	139207	2152	3928	133127	0	16638113	230961	660441	15746711	1	1	0.17114	1.59079	35.3947	1.5459	1.38814
2585	0	84922	2649	386	81887	0	9698003	204536	45875	9447591	1	1	0.202417	3.13358	87.2817	3.11933	2.10905
2584	0	58721	6591	2078	50052	0	6349713	445664	252087	5651961	1	1	0.255291	11.636	76.0295	11.2243	7.01865
2584	0	87679	14634	6093	66982	0	7222541	918866	551435	5752239	1	1	0.280874	17.9303	70.6036	16.6904	12.7222
2576	0	26858	1760	899	24199	0	3977997	197546	132725	3647725	1	1	0.209755	6.77992	66.1903	6.55298	4.96597
201	1	19443	583	1534	17326	0	2549288	51540	213638	2284110	1	0	0.172611	3.25535	27.539	2.99851	2.02174
2072	1	118486	2324	6817	109345	0	17944740	245933	1032701	16666105	0	0	0.15043	2.08115	25.4239	1.96141	1.3705
1710	1	54859	4107	3747	47005	0	7270902	359188	409606	6502106	1	1	0.158543	8.0353	52.2918	7.48647	4.94007
2457	0	96623	9186	325	87112	0	10060016	849377	40682	9169956	1	1	0.197261	9.53914	96.5829	9.50705	8.4431
2453	0	25810	2091	533	23186	0	2677290	136834	76129	2464326	0	1	0.238932	8.27234	79.6875	8.10151	5.11091
2452	0	113325	13330	3760	96235	0	10608257	825701	348512	9434343	1	1	0.250353	12.1663	77.9988	11.7626	7.78357
2439	0	17504	2833	387	14284	0	1638264	167424	41827	1429012	1	1	0.245272	16.5508	87.9814	16.1849	10.2196
2439	0	28321	1468	1562	25291	0	4270436	145044	183213	3942178	0	0	0.170384	5.486	48.4488	5.18343	3.39647
299	1	7821	135	711	6975	0	750241	9014	55716	685510	0	0	0.212401	1.89873	15.9574	1.72612	1.20148
2431	0	13340	3977	425	8938	0	1774847	337753	46259	1390834	1	1	0.187653	30.7937	90.3453	29.8126	19.03
2424	0	32402	5165	506	26731	0	4131128	413367	50296	3667465	1	1	0.19737	16.1933	91.0774	15.9404	10.0062
2424	0	16105	957	212	14936	0	1863454	65131	21189	1777133	1	1	0.239557	6.02152	81.8648	5.94225	3.49518
2419	0	41209	4246	351	36612	0	3475341	228068	29974	3217299	1	1	0.309907	10.3921	92.3646	10.3036	6.56246
2418	0	10516	1556	478	8482	0	1356518	129114	55168	1172234	1	1	0.186327	15.5011	76.4995	14.7965	9.51805
2412	0	13589	863	494	12232	0	1469768	62918	47077	1359773	1	0	0.230809	6.5903	63.5962	6.35072	4.28081
2409	0	11148	198	52	10898	0	1067912	15328	7435	1045149	1	1	0.210403	1.78443	79.2	1.7761	1.43532
2404	0	48476	2978	1356	44342	0	5673003	195990	148637	5328375	1	1	0.255783	6.29332	68.7125	6.14325	3.45478
2404	0	18474	1083	236	17155	0	1967346	75507	28912	1862926	1	1	0.238799	5.93815	82.1077	5.86229	3.83801
883	1	50106	493	4838	44775	0	6190506	40030	553451	5597024	0	0	0.164481	1.08907	9.2478	0.983914	0.646635
763	1	36968	1516	4219	31233	0	4973333	155212	562426	4255695	0	0	0.156038	4.62915	26.4342	4.10084	3.12088
2389	0	30003	4736	1404	23863	0	3158991	291013	117652	2750325	1	1	0.247011	16.56	77.1336	15.7851	9.21221
1622	1	111283	5368	2447	103468	0	16249458	448887	350478	15450093	1	1	0.193197	4.93219	68.6884	4.82374	2.76247
2017	1	31175	291	492	30392	0	2858250	14743	67715	2775790	1	1	0.290969	0.948408	37.1648	0.93344	0.515805
2361	0	76437	5251	1774	69412	0	7730514	342830	207526	7180158	1	1	0.257203	7.03293	74.7473	6.86971	4.43476
137	1	30424	203	2032	28189	0	3293365	18327	247423	3027614	1	0	0.151995	0.71499	9.08277	0.667236	0.556483
2352	0	41461	7877	724	32860	0	5009279	489921	110159	4409199	1	1	0.248529	19.3362	91.5824	18.9986	9.78027
2348	0	41158	2427	539	38192	0	4558668	162181	59193	4334193	1	1	0.246	5.97504	81.8274	5.89679	3.55764
2340	0	43132	666	3814	38652	0	5362815	53680	442028	4867107	0	0	0.168791	1.69388	14.8661	1.5441	1.00097
2331	0	24516	1193	662	22661	0	3191942	112916	98638	2980387	1	0	0.18309	5.00126	64.3127	4.86621	3.53753
2328	0	21983	1960	588	19435	0	1995607	117363	55510	1822733	1	1	0.273444	9.16102	76.9231	8.91598	5.88107
268	1	22534	578	2341	19615	0	2623409	53721	249275	2320412	1	0	0.148013	2.86238	19.8013	2.56501	2.04776
760	1	87175	4125	13523	69527	0	10796124	389628	1430823	8975681	0	0	0.148121	5.60066	23.3738	4.73186	3.60896
2318	0	22279	580	785	20914	0	23535770	47954	81962	2223653	1	1	0.183722	2.69843	42.4908	2.60335	0.203749
2307	0	38343	1974	725	35644	0	5049668	176620	82683	4790364	1	1	0.188715	5.24749	73.1382	5.14827	3.49766
1386	1	38820	3078	876	34866	0	3876140	212899	126979	3536261	1	1	0.234191	8.11195	77.8452	7.9289	5.49255
2285	0	28533	1610	583	26340	0	2762006	104871	70856	2586278	1	1	0.314759	5.76029	73.4154	5.64259	3.79691
2258	0	57828	3066	439	54323	0	7486333	293676	62663	7129994	1	1	0.164826	5.34249	87.475	5.30193	3.92283
2257	0	88670	3776	1107	83787	0	13028777	367538	158127	12503111	1	0	0.172529	4.31232	77.3295	4.25849	2.82097
378	1	123539	1154	10244	112141	0	9749746	72799	772039	8904907	0	1	0.223839	1.01858	10.1246	0.934118	0.746676
2249	0	59299	9069	924	49306	0	6146059	623622	101529	5420907	1	1	0.219636	15.5358	90.7535	15.2937	10.1467
2247	0	46973	3332	1869	41772	0	6227995	276937	206704	5744353	1	1	0.189111	7.38737	64.0646	7.09344	4.44665
770	1	54602	1117	7388	46097	0	5373372	76691	686780	4609901	1	0	0.201192	2.36582	13.1335	2.04571	1.42724
860	1	87996	895	6605	80496	0	12517440	95045	879524	11542870	0	0	0.163143	1.09963	11.9333	1.01709	0.759301
2242	0	42961	7455	1655	34151	0	4226104	570485	178669	3576950	1	1	0.248	17.9181	81.8332	17.3529	13.4991
2237	0	116489	5562	2513	108414	0	18568988	567084	370338	17631566	1	1	0.198064	4.87997	68.8793	4.7747	3.05393
2236	0	113530	7368	1798	104364	0	10763733	461714	207729	10094289	1	1	0.276761	6.59435	80.384	6.48991	4.28953
2236	0	65303	5256	2573	57474	0	8378611	430362	2912664	7656984	1	1	0.199465	8.37877	67.135	8.04863	5.13644
2235	0	148873	11671	4303	132899	0	18904689	1036403	562156	17306128	1	1	0.17512	8.07291	73.0625	7.83957	5.48225
839	1	32097	358	1999	29740	0	3048343	27367	177111	2843865	0	0	0.247159	1.18945	15.1888	1.11537	0.897766
2221	0	72340	3345	1919	67076	0	10012223	354104	286933	9371186	1	1	0.153539	4.75	63.5448	4.624	3.53672
2216	0	14465	1703	263	12499	0	2124169	169294	37238	1917636	1	1	0.185046	11.9913	86.6226	11.7732	7.96989
555	1	39622	2079	4783	32760	0	4057200	160799	480321	3416079	0	0	0.251787	5.96745	30.2973	5.24708	3.9633
874	1	80733	369	14853	65511	0	101997564	32775	1435804	8728983	1	0	0.179214	0.560109	2.42412	0.457062	0.0321331
234	1	27978	420	3084	24474	0	4161610	40457	459702	3661450	0	0	0.171837	1.68715	11.9863	1.50118	0.972148
259	1	122777	1141	8652	112984	0	14794292	109067	1153346	13531878	0	0	0.164527	0.999781	11.6512	0.929327	0.737224
2208	0	130448	9809	861	119778	0	14892330	800259	98797	13993274	1	1	0.221225	7.56943	91.9306	7.51947	5.37363
485	1	19007	335	1468	17204	0	2291142	26763	160264	2104114	1	1	0.195213	1.91003	18.5801	1.76251	1.16811
2201	0	83881	5679	2073	76129	0	9016339	481173	210647	8324519	1	1	0.207841	6.94186	73.2585	6.77031	5.33668
2200	0	66209	7707	1434	57068	0	7590341	594052	148069	6848219	1	1	0.215914	11.8981	84.3124	11.6404	7.82642
2200	0	22672	1298	728	20646	0	2893078	132363	103028	2657687	1	1	0.182721	5.91506	64.0671	5.72512	4.57516
2193	0	40395	3876	987	35532	0	4993254	320027	131812	4541415	1	1	0.215174	9.83557	79.7039	9.59525	6.40919
2186	0	148050	5990	2146	139655	259	18903914	574923	362660	17940183	1	1	0.17073	4.11274	73.6234	4.04593	3.04129
2186	0	12602	1163	184	10780	475	1994094	123456	42551	1757182	1	1	0.180909	9.73792	86.34	9.22869	6.19108
2180	0	39183	10598	570	27898	117	4056851	704198	93637	3246188	1	1	0.255365	27.5301	94.8961	27.0474	17.3582
2179	0	68715	13271	407	55034	3	6404591	761634	57717	5585099	1	1	0.283803	19.429	97.0244	19.3131	11.892
2178	0	71329	4318	1779	65202	30	9403035	351360	294994	8752980	1	1	0.197671	6.21116	70.8217	6.05364	3.73667
2173	0	66929	11792	2174	52951	12	8300205	1062454	336899	6899933	1	1	0.190855	18.2136	84.4336	17.6187	12.8003
2170	0	109722	7173	975	101567	7	13614026	753947	158283	12701255	1	1	0.166669	6.59647	88.0339	6.53743	5.53802
2165	0	61697	11834	768	49030	65	6516832	774944	109659	5627249	1	1	0.286422	19.4433	93.9057	19.1808	11.8914
2164	0	49168	6592	561	41915	100	7424593	660754	93883	6658435	1	1	0.173066	13.5898	92.1571	13.4071	8.89953
2163	0	186897	33755	2090	151019	33	20926382	2719776	314548	17888695	1	1	0.190684	18.2683	94.1693	18.0608	12.9969
212	1	52159	1185	3653	47321	0	7674691	76302	418396	7179993	1	0	0.277847	2.443	24.4936	2.2719	0.994203
2136	0	51032	2906	1340	46781	5	6488716	296314	217221	5974794	1	1	0.170588	5.84861	68.4409	5.69447	4.5666
2131	0	177163	67864	7535	101764	0	12415178	3631801	580078	8203299	1	1	0.384852	40.0075	90.0065	38.306	29.2529
2130	0	26886	2057	1002	23827	0	4248148	202325	133953	3911868	1	1	0.192262	7.94699	67.2442	7.65082	4.76266
322	1	54790	948	3408	50434	0	5887904	50637	332985	5504281	0	0	0.281557	1.845	21.7631	1.73024	0.860017
526	1	25459	218	1016	24225	0	3348271	13584	126463	3208223	0	0	0.268186	0.891871	17.6661	0.856279	0.405702
1100	1	109021	11889	2017	95115	0	8671178	786162	226803	7658212	1	1	0.276885	11.1108	85.4955	10.9052	9.06638
1033	1	246122	2598	1565	241959	0	26427149	218775	216006	25992368	0	0	0.238498	1.06233	62.4069	1.05557	0.827842
2117	0	32717	1158	205	31354	0	3757564	92809	21580	3643174	1	0	0.237741	3.56176	84.9596	3.53944	2.46992
2116	0	14762	1641	157	12964	0	1697998	126667	13692	1557638	1	1	0.231232	11.2359	91.2681	11.1164	7.45978
959	1	20050	479	900	18671	0	1989583	32538	92041	1865003	1	0	0.241157	2.50131	34.7353	2.38903	1.63542
91	1	60683	681	3121	56881	0	6189199	51360	266810	5871029	1	0	0.232544	1.18307	17.9116	1.12223	0.829833
2101	0	48747	9679	1461	37607	0	6730813	934900	206020	5589892	1	1	0.178807	20.4691	86.8851	19.8556	13.8899
2096	0	58649	7668	2457	48524	0	7025386	502851	348313	6174221	1	1	0.272593	13.6461	75.7333	13.0744	7.15763
2095	0	88188	9694	1875	76619	0	12036517	759657	293286	10983573	1	1	0.210267	11.2312	83.7929	10.9924	6.31127
2093	0	141186	23347	11913	105926	0	18443141	1743577	1630660	15068903	1	1	0.234986	18.0602	66.2138	16.5363	9.4538
2090	0	31464	4359	1169	25936	0	4188891	335500	165515	3687875	1	1	0.223139	14.3885	78.8531	13.8539	8.00928
2090	0	13529	897	979	11653	0	2001170	68176	148308	1784685	1	1	0.205928	7.14741	47.8145	6.6302	3.40681
2090	0	30925	3088	1825	26012	0	2079647	267195	272772	4539679	1	1	0.190358	10.6117	62.8537	9.98545	12.8481
2088	0	56591	5099	2778	48714	0	7271656	356385	341513	6573757	1	1	0.23751	9.47541	64.7328	9.01027	4.90102
2083	0	101615	13676	2036	85903	0	11216521	1011626	260535	29944360	1	1	0.199605	13.7338	87.0418	13.4586	9.01907
2081	0	161606	6418	3461	151727	0	21021853	506214	494301	20021337	1	1	0.215644	4.0583	64.9661	3.97139	2.40804
755	1	173309	5603	3606	164100	0	20609044	425384	402210	19781449	1	0	0.249508	3.30165	60.8427	3.23295	2.06406
1741	1	87218	10757	2884	73577	0	12029428	969767	442918	10616742	1	1	0.174397	12.7552	78.8579	12.3335	8.06162
2076	0	56850	8036	2294	46520	0	6959248	672373	384739	5902134	1	1	0.220529	14.7298	77.7928	14.1354	9.66158
2074	0	50196	1421	238	48537	0	4556813	70844	21988	4463981	1	1	0.245323	2.84439	85.654	2.8309	1.55468
499	1	54095	2063	12158	39874	0	5776169	125309	1338501	4312358	0	0	0.272556	4.91928	14.5067	3.81366	2.16941
2061	0	124787	5235	2710	116842	0	16095968	430060	382733	15283175	1	1	0.184681	4.28828	65.8905	4.19515	2.67185
2060	0	158598	13240	4163	141195	0	15394560	1049675	603650	13741234	1	1	0.242947	8.57319	76.0788	8.34815	6.81848
187	1	246076	4895	35074	206106	1	30774406	452414	4037106	26284675	0	0	0.190412	2.31989	12.247	1.98922	1.4701
2059	0	73762	2632	2118	69012	0	7237417	265797	287355	6684264	1	1	0.172569	3.67372	55.4105	3.56823	3.67254
2058	0	148563	7893	1417	139253	0	12048925	504423	180062	11364438	1	1	0.261069	5.36406	84.7798	5.3129	4.18646
2053	0	108935	7015	2702	99218	0	12606670	443477	315591	11847602	0	1	0.24529	6.60341	72.1931	6.43962	3.5178
2047	0	115979	6761	4549	104669	0	12762948	510152	603666	11649129	1	1	0.227032	6.06749	59.779	5.8295	3.99713
812	1	84071	2878	2883	78310	0	12704262	298318	505974	11899968	1	0	0.142637	3.54486	49.9566	3.4233	2.34817
244	1	108908	898	8757	99253	0	8252292	60834	734283	7457174	1	0	0.233744	0.896646	9.30088	0.824549	0.737177
1309	1	101866	11193	4129	86544	0	11387869	755024	463432	10169412	1	1	0.256108	11.4522	73.0518	10.988	6.63007
2040	0	35998	2207	752	33039	0	3436133	134934	96146	3205053	1	1	0.2547	6.2617	74.586	6.1309	3.92691
2039	0	39327	3465	1061	34801	0	4826490	222461	124889	4479140	1	1	0.238651	9.05504	76.5577	8.81074	4.60917
2039	0	59986	2290	2162	55534	0	5332490	145753	187114	4999622	1	1	0.28916	3.96029	51.4376	3.81756	2.7333
2038	0	87258	6132	4180	76946	0	10262425	507054	479699	9275671	0	1	0.218159	7.38102	59.4647	7.02744	4.94088
466	1	45046	1205	3596	40245	0	4851607	77743	417459	4356404	1	0	0.218726	2.90712	25.0989	2.67504	1.60242
2033	0	95589	7376	3673	84540	0	9552896	530039	348958	8673898	1	1	0.23963	8.02472	66.7572	7.71637	5.54846
2033	0	97533	12522	4766	80245	0	10147708	975470	464057	8708181	1	1	0.204441	13.4983	72.4317	12.8387	9.61271
383	1	105880	5701	9614	90565	0	13905254	564870	1320244	12020140	0	0	0.1437	5.92213	37.2249	5.3844	4.06228
2027	0	228456	10432	1729	216295	0	22130783	790970	202487	21137325	1	1	0.214252	4.60113	85.7824	4.56631	3.57407
2027	0	104963	6391	1138	97434	0	9642102	498115	138494	9005492	1	1	0.184788	6.15555	84.8851	6.08881	5.16604
2026	0	52730	5101	3451	42674	1504	5040959	349657	374029	4182079	1	1	0.251427	10.6771	59.6469	9.67381	6.93632
2026	0	49949	1243	776	47851	79	4855769	96461	88684	4662166	1	1	0.240647	2.53188	61.5651	2.48854	1.98652
943	1	10185	301	905	8979	0	1136586	21937	105832	1008816	1	0	0.197726	3.24353	24.9585	2.95533	1.93008
2015	0	43105	1312	699	41094	0	4609170	102605	85340	4421225	1	0	0.202726	3.0939	65.2412	3.04373	2.22611
1858	1	26367	3878	1554	20935	0	3888977	307349	234415	3347212	1	1	0.193646	15.6289	71.3918	14.7078	7.90308
2011	0	43555	4494	431	38630	0	4876673	350112	56009	4470551	1	1	0.188402	10.4211	91.2487	10.318	7.17932
2011	0	173805	5952	2955	164898	0	16878963	486838	398904	15993220	1	0	0.224035	3.48376	66.8238	3.42453	2.88429
349	1	63139	311	3420	59408	0	7500786	24018	346297	7130470	0	0	0.179032	0.520772	8.33557	0.492564	0.320206
2006	0	30557	1302	529	28726	0	3899297	117100	75282	3706914	1	1	0.167602	4.33595	71.1087	4.26089	3.00311
514	1	33473	546	2145	30782	0	3126519	39158	206586	2880775	0	0	0.221041	1.74285	20.2899	1.63117	1.25245
2004	0	64484	2633	1184	60667	0	5898457	192166	116060	5590230	1	0	0.209112	4.15956	68.9809	4.08318	3.2579
2004	0	69776	7258	1754	60764	0	8030572	613555	246749	7170268	1	1	0.19999	10.6701	80.5371	10.4019	7.64024
2002	0	54990	1468	442	53080	0	5567492	119658	67257	5380577	1	1	0.179099	2.69121	76.8586	2.66958	2.14923
1154	1	264077	27362	5691	231024	0	24140963	1617004	572656	21951303	1	1	0.252482	10.5896	82.7822	10.3614	6.69818
1265	1	38021	2114	361	35546	0	3438211	150566	50743	3236901	1	1	0.248486	5.61338	85.4141	5.56009	4.3792
994	1	35083	683	2864	31536	0	3860063	44797	297311	3517954	0	0	0.203181	2.11987	19.2557	1.94681	1.16053
1995	0	228662	45461	3651	179550	0	27280801	3806798	602364	22871639	1	1	0.177519	20.2039	92.566	19.8813	13.9541
819	1	64994	2673	7536	54785	0	6414635	190681	844137	5379917	0	0	0.250582	4.65209	26.1828	4.11269	2.97259
1091	1	113355	36203	12619	64533	0	8637577	1920047	846879	5870650	1	1	0.297792	35.9385	74.153	31.9377	22.229
1990	0	98199	6079	844	91276	0	9885294	438975	89925	9356394	1	1	0.286597	6.24416	87.8088	6.19049	4.44069
1989	0	76500	16852	2548	57100	0	9558480	1214593	480940	7862946	1	1	0.32047	22.7878	86.866	22.0288	12.707
558	1	31745	1831	3442	26472	0	4244883	180731	490259	3573893	0	0	0.137444	6.46928	34.7241	5.76784	4.25762
938	1	138829	4174	6631	128019	5	15726690	338698	789607	14597791	0	0	0.181779	3.1575	38.6303	3.00658	2.15365
1988	0	88639	4291	523	83825	0	7297069	278862	66632	6951575	1	1	0.291864	4.86972	89.1359	4.84098	3.82156
1984	0	117932	8404	2952	106576	0	13984286	804572	470538	12709176	1	0	0.165797	7.3091	74.0049	7.12614	5.7534
1983	0	34264	3965	1072	29227	0	3955309	328100	144723	3483485	1	1	0.185447	11.9456	78.7175	1.15711	8.29518
1982	0	75189	7883	1840	65466	0	7169222	519615	279789	6369817	1	1	0.244485	10.7472	81.0758	10.4842	7.24786
1974	0	124035	10494	815	112726	0	14349553	902206	137052	13310293	1	1	0.235278	8.51647	92.7934	8.46052	6.28735
1971	0	125596	14318	1977	109301	0	9886490	712064	244801	8929624	1	1	0.320899	11.5824	87.8674	11.4	7.20239
1969	0	288268	42361	11473	234434	0	24533270	2394683	1297356	20841230	1	1	0.366558	15.3041	78.6882	14.695	9.76096
1963	0	173991	15500	4843	153648	0	14996506	914086	633284	13449135	1	1	0.307929	9.16357	76.1933	8.90851	6.09533
1961	0	38168	2579	241	35348	0	4405273	234060	37826	4133387	1	0	0.164174	6.79991	91.4539	6.75697	5.31318
1960	0	148218	13614	1823	132781	0	15223193	922411	244806	14055975	1	1	0.244373	9.2995	88.1907	9.18512	6.05925
1960	0	94763	8102	1207	85454	0	11824496	596634	170864	11056997	1	0	0.213158	8.66005	87.0341	8.54975	5.04575
1953	0	178066	26780	8577	142709	0	21604915	1953805	1080882	18570227	1	1	0.200941	15.8004	75.7417	15.0394	9.04334
323	1	82884	3212	9326	70346	0	7666664	228470	856610	6581583	0	0	0.204234	4.36662	25.6181	3.8753	2.98004
1948	0	108583	5074	2399	101110	0	12112961	379813	321157	11411990	1	1	0.229512	4.7785	67.8978	4.67292	3.13559
1947	0	22216	1330	256	20630	0	3037346	80539	34011	2922796	1	1	0.292391	6.05647	83.8588	5.98668	2.65162
1004	1	65827	2448	5277	58102	0	6983153	170759	569000	6243393	1	0	0.200476	4.04294	31.6893	3.71884	2.4453
515	1	50992	609	3864	46519	0	4838216	52919	337711	4457585	1	0	0.201072	1.29223	13.615	1.1943	1.09377
1927	0	194047	10431	5345	178271	0	21799908	642014	812979	20344914	1	1	0.275996	5.52776	66.1194	5.3755	2.94503
847	1	111699	3208	2796	105695	0	12126554	281324	454796	11390433	0	0	0.197542	2.94574	53.431	2.872	2.3199
577	1	144116	6423	16025	121668	0	13126297	533333	1792419	10800544	1	1	0.174505	5.0144	28.6128	4.45683	4.06309
1910	0	125226	16438	5032	103756	0	15950225	992674	6997975	14259575	1	1	0.271398	13.6762	76.5626	13.1267	6.22357
1910	0	241138	41651	11819	187668	0	26057285	2378441	1174077	22504766	1	1	0.301902	18.1629	77.896	17.2727	9.12774
1908	0	100522	12004	3020	85498	0	10190738	848944	355223	8986570	1	1	0.218673	12.3115	79.8988	11.9417	8.33054
568	1	104451	1250	4700	98501	0	13007524	146643	893926	11966954	0	0	0.131418	1.25312	21.0084	1.19673	1.12737
1906	0	140012	6295	2912	130805	0	14137495	336665	300212	13500617	1	1	0.289693	4.59154	68.3719	4.49604	2.38136
1901	0	186995	9562	1988	175445	0	18637441	652956	247840	17736644	1	0	0.248527	5.16845	82.7879	5.11351	3.50346
207	1	57771	227	3172	54372	0	5527796	19274	402277	5106245	0	0	0.175483	0.415759	6.67843	0.392931	0.348674
1894	0	231331	12383	2589	216359	0	23109712	853123	351392	21905197	1	1	0.264647	5.41352	82.7077	5.35294	3.69162
1891	0	111106	13923	4626	92557	0	13071831	857279	497573	11716978	1	1	0.283387	13.0757	75.0607	12.5313	6.55822
1887	0	76673	5064	1428	70181	0	9011273	416477	176144	8418651	1	0	0.258	6.73002	78.0037	6.60467	4.62173
364	1	25959	1567	1879	22513	0	3976055	161302	295143	3519609	1	1	0.129203	6.50748	45.473	6.03644	4.05684
43	1	75885	395	3837	71653	0	7425207	33926	463236	6928044	1	0	0.264952	0.548246	9.33365	0.520524	0.456903
1877	0	96385	7232	563	88590	0	8526618	364971	66774	8094872	1	1	0.33284	7.54733	92.7774	7.50324	4.28037
1872	0	56857	2097	1317	53443	0	6455244	142081	159548	6153613	1	1	0.266497	3.77566	61.4236	3.6882	2.20102
92	1	58355	849	3394	54112	0	6034078	72570	391789	5569719	1	0	0.196411	1.54473	20.0094	1.45489	1.20267
1856	0	38251	4319	1512	32420	0	3411919	202606	162394	3046918	1	1	0.333584	11.7559	74.0696	11.2912	5.93818
30	1	53792	1073	2488	50231	0	4981824	62573	315843	4603407	0	0	0.223604	2.09145	30.132	1.99472	1.25603
1850	0	173484	9870	2330	161284	0	16395147	619185	294207	15481753	1	1	0.321329	5.76674	80.9016	5.68929	3.77664
1849	0	77762	2572	2357	72833	0	7026737	169853	273190	6583693	1	1	0.273625	3.41091	52.181	3.30753	2.41724
1845	0	163690	24525	3930	135235	0	17845603	1712588	475064	15657950	1	1	0.227439	15.3512	86.1887	14.9826	9.59669
509	1	15341	287	1331	13723	0	2108922	22967	193048	1892907	1	0	0.180368	2.04854	17.7379	1.8708	1.08904
1842	0	239021	33179	6614	199228	0	28274344	2190511	868197	25215636	1	1	0.248316	14.2762	83.379	13.8812	7.74735
1841	0	231881	18569	3474	209838	0	21507467	1233521	431110	19842836	1	1	0.256187	8.12979	84.2399	8.00799	5.73532
662	1	22609	489	2646	19474	0	2960552	53968	335485	2571097	0	0	0.161869	2.44953	15.5981	2.16286	1.8229
1838	0	165712	36374	5931	123407	0	16560787	2113489	718884	13728414	1	1	0.31255	22.7649	85.9804	21.9501	12.762
692	1	79131	1413	4460	73258	0	9527696	122223	487634	8917839	0	0	0.235113	3.16313	24.0593	1.78565	1.28282
860	1	46385	500	5000	40885	0	5018446	49752	503711	4464982	1	0	0.168263	1.20817	9.09091	1.07793	0.991383
1836	0	51474	1912	712	48850	0	5238971	95183	90714	5053073	1	1	0.313372	3.7666	72.8659	3.7145	1.81683
