# Supplementary material for: Constructing a neural network model based on tumor-infiltrating lymphocytes (TILs) to predict the survival of hepatocellular carcinoma patients
Source: PeerJ journal article supplement (doi:10.7717/peerj.19351), 2025-04-23
Supplement: b.xlsx [file b.xlsx]

## Sheet: Sheet1
Id	Over Survival	Dead Status	Total Cell Count	Lymphocyte Count	Stroma Count	Tumor Cell Count	Other Cell Count	Total Area	Lymphocyte Area	Stroma Area	Tumor Cell Area	Peritumoral Lymphocyte Invasion（PLS）	Tertiary Lymphoid Structures（TLS）	lymn-c	etils%	eatils%	ettils%	eatils%	age	gender	grade	stage	T	M	N
TCGA-DD-A4NR	9	1	34292	1875	3665	28752	0	3486432	141716	429144	2915571	0	0	0.23156	6.12205	33.8448	5.46775	4.06479	85	FEMALE	G3	Stage I	T1	M0	N0
TCGA-DD-AADM	12	1	13624	377	2568	10679	0	2188536	46049	374228	1768258	0	0	0.154552	3.40991	12.8014	2.76718	2.1041	58	MALE	G3	Stage II	T2	M0	N0
TCGA-DD-A11B	14	1	31173	638	3062	27473	0	2940326	51451	309476	2579399	0	0	0.212369	2.26957	17.2432	2.04664	1.74984	73	MALE	G2	Stage I	T1	M0	N0
TCGA-DD-AAC8	16	1	82199	1043	3901	77255	0	9918139	102109	530933	9285095	0	0	0.187031	1.33209	21.0963	1.26887	1.02952	72	MALE	G3	Stage I	T1	M0	N0
TCGA-EP-A2KC	19	1	9277	301	939	8037	0	1194061	26299	119476	1048286	0	0	0.199436	3.60998	24.2742	3.24458	2.20248	62	MALE	G3	Stage I	T1	MX	NX
TCGA-G3-AAV4	27	1	105527	2045	8299	95183	0	13597500	203669	1183851	12209979	1	0	0.183195	2.1033	19.7699	1.93789	1.49784	83	FEMALE	G1	Stage I	T1	M0	N0
TCGA-GJ-A6C0	31	1	10593	161	585	9847	0	1313799	16917	72061	1224820	0	0	0.174527	1.60871	21.5818	1.51987	1.28764	75	FEMALE	G2	Stage II	T2	MX	NX
TCGA-BC-A10Z	34	1	9091	3	1174	7914	0	1332707	369	164591	1167747	0	0	0.130367	0.0378931	0.254885	0.0329997	0.027688	62	FEMALE	G2	Stage I	T1	MX	N0
TCGA-2Y-A9HA	36	1	81427	550	11485	69392	0	11898210	38867	1777601	10081742	0	0	0.241498	0.786366	4.57	0.675452	0.326663	70	MALE	G2	Stage II	T2	MX	NX
TCGA-5R-AAAM	46	1	16502	470	1658	14374	0	1956685	44190	198931	1713563	0	1	0.187774	3.16626	22.0865	2.84814	2.25841	65	FEMALE	G2	Stage II	T2	M0	N0
TCGA-UB-A7MD	52	1	43007	247	2615	40145	0	5373622	24109	284980	5064532	1	0	0.154865	0.611507	8.63033	0.574325	0.448655	67	MALE	G3	Stage I	T1	MX	N0
TCGA-ED-A8O6	56	1	68965	100	6175	62558	132	10403331	8938	952009	9423228	1	0	0.166914	0.159597	1.59363	0.145001	0.0859148	50	FEMALE	G3	Stage IIIA	T3a	M0	N0
TCGA-G3-AAV6	65	1	73322	1286	4435	67601	0	6900776	98847	462562	6339366	0	1	0.218516	1.86683	22.4786	1.75391	1.4324	53	FEMALE	G3	Stage IIIA	T3a	M0	N0
TCGA-GJ-A9DB	67	1	22136	373	2040	19723	0	3396668	42101	302253	3052313	0	0	0.165749	1.85609	15.4579	1.68504	1.23948	68	MALE	G2	Stage I	T1	MX	N0
TCGA-CC-5260	87	1	96052	2482	17697	75873	0	11692676	208757	1940793	9543135	0	0	0.232691	3.16763	12.2999	2.58402	1.78537	61	FEMALE	G1	Stage IIIC	T4	M0	N0
TCGA-BC-A10W	91	1	174474	407	14269	159798	0	15643407	47818	1542754	14052834	1	0	0.203179	0.254049	2.77324	0.233273	0.305675	50	MALE	G3	unknow	T4	MX	NX
TCGA-HP-A5MZ	91	1	59817	1132	4233	54435	17	7540596	128572	639166	6770798	1	0	0.171759	2.03718	21.0997	1.89244	1.70506	78	MALE	G2	Stage I	T1	M0	NX
TCGA-CC-5261	97	1	70850	163	6685	64002	0	8515226	13351	709892	7791982	0	0	0.207215	0.254033	2.38026	0.230064	0.15679	44	MALE	G2	Stage II	T2	M0	N0
TCGA-CC-A1HT	101	1	69390	3309	4788	61293	0	6522061	250025	584614	5687421	0	0	0.240561	5.12213	40.867	4.7687	3.83353	50	MALE	G3	Stage IIIA	T3	M0	N0
TCGA-CC-5264	102	1	45981	176	7046	38759	0	5625187	17689	856812	4750685	0	0	0.186073	0.452035	2.437	0.382767	0.314461	71	MALE	G2	Stage IIIA	T3	M0	N0
TCGA-CC-5262	103	1	68280	729	3831	62890	830	8840791	69313	595026	8090468	0	0	0.186869	1.14588	15.9868	1.06766	0.784014	67	MALE	G1	Stage IIIC	T4	M0	N0
TCGA-DD-AACL	107	1	5654	66	640	4948	0	885565	6387	74283	804894	0	0	0.200291	1.31631	9.34844	1.16732	0.721234	66	FEMALE	G3	Stage I	T1	M0	N0
TCGA-DD-AADF	115	1	48683	2456	2388	43839	0	8712656	264725	427043	8020887	0	1	0.193507	5.30511	50.7019	5.04488	3.0384	64	FEMALE	G4	Stage I	T1	M0	N0
TCGA-CC-5263	129	1	50702	272	4273	46135	22	4539550	17419	438082	4080485	0	0	0.234219	0.586118	5.9846	0.536468	0.383716	35	MALE	G1	Stage IIIA	T3	M0	N0
TCGA-CC-5258	129	1	81903	2727	11988	67188	0	11020825	213733	1544004	9263087	1	1	0.315154	3.90045	18.5321	3.32955	1.93936	48	MALE	G2	Stage II	T2	M0	N0
TCGA-CC-A8HT	140	1	79082	506	4960	73616	0	9206242	40131	401909	8764202	0	0	0.193862	0.682658	9.25723	0.639842	0.435911	74	MALE	G2	Stage IIIA	T3	M0	N0
TCGA-BC-A112	153	1	60616	981	3929	55706	0	5065929	57944	342397	4665587	0	1	0.298609	1.73056	19.9796	1.61838	1.1438	80	MALE	G2	unknow	T3	MX	NX
TCGA-DD-AACZ	171	1	17573	533	1019	16021	0	2181134	49065	121818	2010251	0	0	0.204122	3.21977	34.3428	3.03306	2.24952	63	FEMALE	G4	Stage I	T1	M0	N0
TCGA-DD-A39Y	171	1	133121	4066	12789	116266	0	12607602	317530	1154390	11135681	1	0	0.248798	3.37898	24.1234	3.05436	2.51856	67	MALE	G3	Stage I	T1	M0	NX
TCGA-FV-A3R2	194	1	39237	233	1922	36979	103	4359742	15890	185971	4145350	0	0	0.244464	0.626142	10.8121	0.593827	0.364471	75	MALE	unknow	Stage I	T1	MX	NX
TCGA-DD-AACH	195	1	158286	1627	16654	140005	0	16283426	101126	2062469	14119830	1	0	0.220486	1.14875	8.89995	1.02789	0.621036	69	MALE	G3	Stage II	T2	M0	N0
TCGA-UB-A7MF	214	1	75123	1565	6203	67355	0	8649150	116788	703498	7828863	0	0	0.215481	2.27075	20.1468	2.08325	1.35028	56	MALE	G2	Stage IIIA	T3a	MX	NX
TCGA-CC-A7IE	217	1	6753	333	1258	5162	0	942797	29952	187819	725025	1	0	0.205742	6.06005	20.9302	4.93114	3.17693	57	MALE	G2	Stage IIIA	T3	M0	N0
TCGA-DD-A119	223	1	83472	1333	9302	72837	0	10144866	136993	1388171	8619702	0	0	0.172927	1.79722	12.5341	1.59694	1.35037	40	MALE	G3	Stage IV	T3a	M1	N0
TCGA-DD-A3A1	233	1	78430	7843	12177	58410	0	10224379	699989	1318438	8205952	0	1	0.209724	11.838	39.1758	10	6.84627	65	MALE	G2	Stage IIIA	T3b	M0	N0
TCGA-FV-A3I1	247	1	26780	390	1432	24958	0	2787259	30095	188799	2568364	1	0	0.249552	1.53858	21.405	1.45631	1.07973	81	FEMALE	G2	Stage II	T2	MX	N0
TCGA-4R-AA8I	262	1	341190	1632	14536	325022	0	36662909	117234	1769788	34775887	0	0	0.237257	0.499611	10.094	0.478326	0.319762	66	MALE	G2	Stage II	T2	MX	NX
TCGA-CC-A7IK	262	1	61572	585	6201	54786	0	6564070	53788	426965	6083316	0	0	0.309033	1.05651	8.62069	0.950107	0.819431	59	MALE	G3	Stage IIIA	T3	M0	N0
TCGA-CC-A5UE	272	1	85685	38	2303	83344	0	8749709	2717	181527	8565464	0	0	0.200158	0.0455734	1.62324	0.0443485	0.0310525	48	MALE	G2	Stage IIIB	T4	M0	N0
TCGA-CC-A7IL	278	1	49409	110	8829	40017	453	6315297	7259	939548	5319227	0	0	0.253011	0.27413	1.23056	0.222632	0.114943	61	MALE	G1	Stage IIIA	T3	M0	N0
TCGA-CC-A8HV	279	1	93245	771	12238	80112	124	9698798	51568	1212416	8421458	0	0	0.223332	0.953229	5.92667	0.826854	0.531695	51	FEMALE	G2	Stage II	T2	M0	N0
TCGA-DD-A73B	283	1	254724	698	6896	239861	7269	23895457	51217	312140	22838761	0	0	0.192431	0.290158	9.19147	0.274022	0.214338	72	FEMALE	G2	Stage I	T1	M0	N0
TCGA-ED-A66Y	296	1	170277	2197	16018	152062	0	18686669	190937	1964036	16531695	1	0	0.241447	1.42423	12.0615	1.29025	1.02178	51	FEMALE	G3	Stage IIIA	T3a	M0	N0
TCGA-CC-A7IG	299	1	45917	239	2877	42801	0	5286073	20091	365643	4900338	1	0	0.134508	0.555297	7.67009	0.520504	0.380074	47	MALE	G2	Stage II	T2	M0	N0
TCGA-CC-A8HS	300	1	98383	636	17476	80245	26	9817035	38393	1343742	8431875	0	0	0.233424	0.78634	3.51148	0.646453	0.391085	18	MALE	G1	Stage IIIC	T3	M0	N1
TCGA-CC-A3M9	300	1	42342	1360	6267	34715	0	4227705	97313	668612	3461779	1	1	0.236667	3.76992	17.8314	3.21194	2.30179	45	MALE	G3	Stage IIIA	T3	M0	N0
TCGA-CC-A3MA	303	1	36104	578	1435	26311	7780	2906918	34407	111291	2218377	0	0	0.280584	2.14958	28.7134	1.60093	1.18362	61	MALE	G2	Stage IIIA	T3	M0	N0
TCGA-CC-A5UD	304	1	19774	59	764	18951	0	2270675	5208	86616	2178850	0	0	0.23229	0.310363	7.16889	0.298372	0.229359	45	MALE	G2	Stage IIIA	T3	M0	N0
TCGA-BC-A10R	308	1	76389	128	7289	68972	0	9075774	12825	1075121	7987827	0	0	0.182962	0.185239	1.72577	0.167563	0.14131	66	FEMALE	G2	unknow	T3	MX	NX
TCGA-CC-A3MB	315	1	118442	1266	14683	102493	0	12393289	104415	1180626	11108247	0	0	0.219622	1.22014	7.9378	1.06888	0.842512	36	MALE	G1	Stage IIIA	T3	M0	N0
TCGA-CC-A8HU	344	1	92570	847	9318	82339	66	10174613	76538	1045894	9045844	0	0	0.213579	1.0182	8.33251	0.914983	0.752245	39	FEMALE	G3	Stage IIIA	T3	M0	N0
TCGA-CC-A5UC	347	1	49354	271	5784	43295	4	6230437	27014	675241	5527802	1	1	0.151473	0.622045	4.47564	0.549094	0.433581	63	MALE	G3	Stage IIIA	T3	M0	N0
TCGA-DD-A1EE	349	1	32720	741	753	31226	0	3329549	57266	92482	3179800	0	0	0.217505	2.31802	49.5984	2.26467	1.71993	73	MALE	G3	Stage IIIA	T3	M0	N0
TCGA-G3-AAV1	359	1	219569	5420	28583	185496	70	24061048	457718	3701391	19894462	0	1	0.221754	2.83894	15.9398	2.46847	1.90232	51	MALE	G3	Stage IIIC	T4	M0	N0
TCGA-DD-AACF	365	1	37698	1244	1433	31947	3074	3412375	91015	149839	2915343	0	0	0.284979	3.748	46.4699	3.29991	2.6672	68	MALE	G3	Stage I	T1	M0	N0
TCGA-FV-A3R3	366	1	28120	138	1900	26082	0	2737218	10109	224755	2502354	0	0	0.265659	0.526316	6.77134	0.490754	0.369317	38	FEMALE	G2	Stage I	T1	MX	NX
TCGA-DD-A4NQ	373	1	127201	1503	4421	121277	0	15243848	176098	625155	14442595	0	0	0.129018	1.22414	25.3714	1.18159	1.15521	60	MALE	G3	Stage II	T2	M0	N0
TCGA-DD-AACD	381	1	9016	74	826	8116	0	1145151	7903	109156	1028091	0	0	0.176974	0.903541	8.22222	0.820763	0.690127	48	MALE	G4	Stage I	T1	M0	N0
TCGA-DD-A1EF	394	1	27032	846	2187	23999	0	2597355	59951	212457	2324946	1	0	0.218059	3.40511	27.8932	3.12962	2.30816	57	FEMALE	G3	Stage I	T1	M0	N0
TCGA-DD-AA3A	410	1	36842	503	1858	34481	0	3163775	34051	190299	2939424	0	0	0.247341	1.4378	21.3045	1.36529	1.07628	81	FEMALE	G4	Stage I	T1	MX	N0
TCGA-YA-A8S7	412	1	109223	1615	8850	98758	0	11978927	123499	956513	10898914	0	1	0.235098	1.609	15.4324	1.47863	1.03097	68	MALE	G3	Stage IIIA	T3a	MX	N0
TCGA-DD-A1EL	415	1	148050	2411	13278	132361	0	16416243	192519	1503054	14720669	1	0	0.190463	1.78895	15.3675	1.6285	1.17273	23	MALE	G3	Stage II	T2	M0	N0
TCGA-G3-A25S	416	1	128304	804	9537	117963	0	21015531	110622	1432913	19471995	1	0	0.176234	0.676956	7.77488	0.626637	0.526382	64	MALE	G2	Stage I	T1	M0	N0
TCGA-DD-A3A7	419	1	89265	1108	5326	82831	0	10598083	106419	777462	9714201	0	0	0.207909	1.32001	17.221	1.24125	1.00413	67	MALE	G3	Stage IIIB	T3b	M0	N0
TCGA-DD-AADC	425	1	31718	1132	1382	29204	0	4305124	109468	180520	4015136	1	0	0.185885	3.73154	45.0278	3.56895	2.54274	53	MALE	G3	Stage I	T1	M0	N0
TCGA-DD-AACQ	432	1	24667	235	140	24292	0	1601170	16889	12485	1571795	0	0	0.279074	0.958128	62.6667	0.95269	1.05479	50	MALE	G3	Stage II	T2	M0	N0
TCGA-G3-A25Y	452	1	157176	1191	8189	147796	0	17443204	119998	874099	16449107	1	0	0.152162	0.799399	12.6972	0.757749	0.687936	52	FEMALE	G3	Stage I	T1	M0	N0
TCGA-DD-AACG	469	1	24841	860	602	23379	0	2600467	68959	67389	2464118	0	0	0.224618	3.548	58.8235	3.46202	2.65179	52	MALE	G4	Stage II	T2	M0	N0
TCGA-DD-A3A3	535	1	127205	894	10522	115789	0	18023137	118254	1558796	16346086	0	0	0.127631	0.766178	7.83111	0.702803	0.656123	45	MALE	G2	Stage I	T1	M0	N0
TCGA-BC-A5W4	547	1	62128	304	1118	60675	31	6689252	26065	131378	6529370	0	0	0.188815	0.498532	21.3783	0.489312	0.389655	69	MALE	G3	Stage IIIA	T3a	M0	NX
TCGA-2Y-A9H5	555	1	232612	3386	16514	212712	0	25126290	249342	2185403	22691545	0	1	0.260884	1.56688	17.0151	1.45564	0.992355	59	FEMALE	G3	Stage I	T1	MX	N0
TCGA-WX-AA47	556	1	105061	482	3967	100612	0	11096098	43931	515093	10537073	0	0	0.1946	0.476784	10.8339	0.458781	0.395914	33	FEMALE	G2	Stage IIIA	T3a	MX	NX
TCGA-DD-A1EK	558	1	1163713	32538	170965	960210	0	123579185	3384104	23194156	97000924	1	0	0.204427	3.27757	15.989	2.79605	2.73841	64	FEMALE	G2	Stage IVB	T4	M1	N0
TCGA-FV-A2QR	581	1	31104	113	3784	27207	0	3196878	8959	432875	2755043	0	0	0.217931	0.413616	2.89967	0.363297	0.280242	75	MALE	G1	Stage I	T1	M0	N0
TCGA-DD-A39Z	601	1	34632	951	3865	29814	2	3102451	67290	335471	2699317	0	0	0.260329	3.09118	19.7467	2.74602	2.16893	43	FEMALE	G2	Stage II	T2	M0	NX
TCGA-DD-A3A4	612	1	83545	1532	9756	72257	0	10898882	155821	1151314	9591746	0	0	0.166511	2.07619	13.5719	1.83374	1.4297	37	MALE	G3	Stage IIIA	T3	M0	N0
TCGA-2Y-A9H8	633	1	83524	1282	5151	76669	422	8286782	84700	518378	7643508	1	0	0.256572	1.64462	19.9285	1.53489	1.02211	85	FEMALE	G2	unknow	T1	MX	NX
TCGA-PD-A5DF	639	1	100159	4682	10115	85362	0	12976268	514022	1600377	10861869	1	0	0.136487	5.19968	31.6415	4.67457	3.96125	58	FEMALE	G2	Stage IIIB	T4	M0	N0
TCGA-DD-A39V	643	1	103334	2372	8449	92513	0	10910096	174539	986696	9748860	1	0	0.252644	2.49987	21.9203	2.29547	1.59979	77	MALE	G3	Stage II	T2	M0	NX
TCGA-CC-A7IF	649	1	56588	84	3318	53186	0	7951939	7543	348718	7595677	0	0	0.157864	0.157687	2.46914	0.148441	0.0948574	59	MALE	G1	Stage IIIA	T3	M0	N0
TCGA-DD-A4NE	660	1	53786	114	2644	51028	0	7100724	10407	356451	6733866	0	0	0.16063	0.222909	4.13343	0.211951	0.146563	75	FEMALE	G3	Stage IIIA	T3a	M0	N0
TCGA-XR-A8TF	693	1	14932	182	163	14587	0	1543123	15902	21356	1505864	1	0	0.239204	1.23231	52.7536	1.21886	1.03051	74	MALE	G1	Stage I	T1	MX	NX
TCGA-BC-A10Y	711	1	87456	20	2793	84643	0	8614767	1831	261453	8351482	1	0	0.15489	0.0236231	0.710985	0.0228686	0.0212542	76	MALE	G3	unknow	T4	MX	NX
TCGA-2Y-A9GS	724	1	20971	402	1404	19165	0	3603122	47728	212274	3343120	0	0	0.165114	2.05448	22.2591	1.91693	1.32463	58	MALE	G2	unknow	T2	MX	NX
TCGA-HP-A5N0	752	1	39449	628	1250	37571	0	5960278	70802	169849	5719626	0	0	0.150469	1.64402	33.4398	1.59193	1.1879	90	FEMALE	unknow	unknow	TX	M0	NX
TCGA-2Y-A9GY	757	1	113245	8652	4189	100404	0	11474971	530810	384127	10560032	0	1	0.291536	7.93354	67.3779	7.64007	4.62581	64	FEMALE	G3	Stage II	T2	MX	NX
TCGA-G3-A5SI	768	1	163307	258	8479	154570	0	14206357	22188	910950	13273218	0	0	0.183255	0.166637	2.95296	0.157985	0.156184	44	MALE	G2	Stage II	T2	M0	N0
TCGA-BC-A10X	770	1	85488	361	3781	81194	152	7934540	29510	45338	7435316	0	0	0.20349	0.442646	8.7156	0.422281	0.371918	52	FEMALE	G2	Stage IIIA	T3a	MX	N0
TCGA-DD-A3A0	785	1	100974	480	7788	92706	0	13583308	59112	911789	12612406	1	0	0.193522	0.515099	5.80552	0.47537	0.435181	70	MALE	G2	Stage I	T1	M0	NX
TCGA-DD-A4NG	802	1	19556	458	192	18906	0	1780036	35544	30786	1713706	1	1	0.25314	2.36521	70.4615	2.34199	1.99681	77	MALE	G2	Stage IIIA	T3a	M0	NX
TCGA-DD-A39W	827	1	132255	847	4733	126675	0	17274946	91051	563991	16619903	0	0	0.156338	0.664199	15.1792	0.640429	0.52707	29	FEMALE	G2	Stage III	T3	M0	N0
TCGA-BC-A10U	837	1	103656	480	9553	93623	0	11955630	40694	856448	11058488	0	0	0.218564	0.510079	4.78421	0.46307	0.340375	69	MALE	G2	unknow	T2	MX	NX
TCGA-BC-A10T	837	1	128441	2122	4638	121681	0	14455820	181051	525906	13748862	0	0	0.20702	1.71401	31.3905	1.65212	1.25244	76	MALE	G1	unknow	T4	MX	NX
TCGA-2Y-A9GZ	848	1	105066	490	5409	99167	0	11894292	40955	636807	11216530	0	0	0.230104	0.491686	8.30649	0.466374	0.344325	82	FEMALE	G2	Stage II	T2	MX	NX
TCGA-DD-A4NN	899	1	97837	1576	7081	89180	0	10203127	117220	1087548	8998358	1	1	0.23592	1.73652	18.2049	1.61084	1.14886	56	FEMALE	G3	Stage I	T1	M0	N0
TCGA-DD-A3A9	931	1	100310	7696	4454	88160	0	13944016	707445	778543	12458028	1	1	0.232783	8.02871	63.3416	7.67222	5.07347	64	FEMALE	G2	Stage IVB	T4	M1	N0
TCGA-DD-A1EJ	1005	1	99797	1393	3087	95317	0	9494541	111370	356499	9026671	1	0	0.236231	1.44039	31.0938	1.39583	1.17299	71	FEMALE	G2	Stage IIIC	T1	M0	N1
TCGA-ZP-A9CV	1088	1	279401	10961	11546	256894	0	31996294	872336	1242083	29881875	1	0	0.212365	4.09214	48.7004	3.92304	2.72637	59	MALE	G1	unknow	T1	MX	NX
TCGA-RG-A7D4	1098	0	93822	23409	10612	59801	0	8285233	1399681	849307	6036245	1	1	0.287089	28.1324	68.8075	24.9504	16.8937	69	MALE	G2	Stage II	T2	M0	N0
TCGA-DD-AADG	1145	0	15895	448	141	15306	0	2144808	41571	24870	2078365	1	1	0.209265	2.84372	76.0611	2.8185	1.93822	70	MALE	G3	Stage IIIA	T3a	M0	N0
TCGA-DD-A114	1149	1	10084	813	968	8303	0	995813	61334	104954	829524	1	1	0.22866	8.91839	45.6485	8.06228	6.15919	42	MALE	G3	Stage II	T2	M0	unknow
TCGA-2Y-A9H7	1168	0	27624	4504	2795	20325	0	3438916	314961	324099	2799855	1	1	0.288441	18.1401	61.7071	16.3047	9.15873	81	FEMALE	G2	Stage I	T1	MX	N0
TCGA-DD-AADE	1202	0	38277	2412	1074	34791	0	5566406	193769	147616	5225020	0	0	0.213975	6.48335	69.191	6.30143	3.48104	50	MALE	G4	Stage I	T1	M0	N0
TCGA-DD-A4NK	1210	1	213468	2065	2935	208468	0	25165703	183997	592329	24389377	1	0	0.196662	0.980844	41.3	0.967358	0.731142	80	FEMALE	G2	Stage IIIA	T3	M0	N0
TCGA-2Y-A9H1	1229	1	21650	1104	291	20255	0	2968622	78160	48180	2842281	1	1	0.252444	5.16878	79.1398	5.09931	2.63287	58	MALE	G2	Stage I	T1	MX	NX
TCGA-DD-AADD	1231	0	33681	2644	284	30753	0	4129594	210620	45590	3873384	1	1	0.230481	7.91688	90.3005	7.85012	5.10026	51	MALE	G4	Stage I	T1	M0	N0
TCGA-DD-AADA	1233	0	93838	13073	2592	78173	0	15265291	1123876	477762	13663652	1	1	0.223392	14.3272	83.4536	13.9315	7.3623	66	FEMALE	G3	Stage I	T1	M0	N0
TCGA-ZS-A9CE	1241	0	95276	2349	2552	90375	0	16452895	246500	467911	15738483	1	0	0.150475	2.53332	47.929	2.46547	1.49822	79	FEMALE	G1	Stage II	T2	MX	NX
TCGA-DD-AADB	1242	0	53857	6455	1845	45557	0	5902390	575099	249021	5078269	1	1	0.205193	12.4106	77.7711	11.9854	9.74349	51	MALE	G4	Stage I	T1	M0	N0
TCGA-2Y-A9GW	1271	1	53871	2622	930	50319	0	5849117	189495	146890	5512732	1	1	0.225971	4.95268	73.8176	4.86718	3.23972	64	MALE	G2	Stage I	T1	MX	N0
TCGA-DD-AACN	1302	0	66215	3497	1055	61663	0	7507453	243438	133827	7130187	1	1	0.253588	5.36679	76.8234	5.28128	3.24262	32	MALE	G3	Stage I	T1	M0	N0
TCGA-XR-A8TC	1339	0	505606	14067	14263	477276	0	57690308	1140354	2049279	54500675	1	1	0.210212	2.86297	49.6541	2.78221	1.97668	43	FEMALE	G2	Stage I	T1	MX	NX
TCGA-DD-AAD5	1345	0	62849	4368	1028	57453	0	7342335	405869	164389	6772077	0	0	0.193084	7.06556	80.9489	6.94999	5.52779	54	MALE	G3	Stage I	T1	M0	N0
TCGA-BC-A216	1351	0	24424	1934	355	22135	0	3952958	225345	67930	3659682	0	1	0.157032	8.03523	84.491	7.91844	5.70067	62	FEMALE	G2	Stage IIIA	T3	M0	NX
TCGA-DD-A1EG	1372	1	201862	38163	8722	154977	0	20359917	2756966	1049510	16553441	1	1	0.234857	19.7592	81.397	18.9055	13.5411	76	MALE	G3	Stage I	T1	M0	N0
TCGA-ZS-A9CD	1386	1	30638	3408	961	26269	0	4943047	373778	184099	4385170	1	1	0.128044	11.4836	78.0041	11.1234	7.56169	73	MALE	G2	Stage II	T2	MX	NX
TCGA-BC-A10S	1423	1	27235	673	300	26262	0	4557587	75286	51738	4430561	0	1	0.186055	2.49861	69.1675	2.47109	1.65188	81	MALE	G1	unknow	T3	MX	NX
TCGA-DD-AACW	1424	0	41333	1320	264	39749	0	3866768	96666	26452	3743649	0	0	0.254704	3.2141	83.3333	3.19357	2.49992	43	MALE	G3	Stage I	T1	M0	N0
TCGA-DD-AACY	1450	0	21312	949	352	20011	0	2888732	98249	55981	2734501	0	0	0.165361	4.52767	72.9439	4.45289	3.40111	61	MALE	G3	Stage I	T1	M0	N0
TCGA-2Y-A9H4	1452	0	216336	7776	3710	204850	0	23475924	692137	504353	22279433	1	1	0.211282	3.65713	67.6998	3.59441	2.94828	68	MALE	G2	Stage I	T1	MX	N0
TCGA-BC-4072	1490	1	38767	4287	1972	32508	0	5147103	431580	249279	4466243	1	1	0.233461	11.651	68.4934	11.0584	8.38491	74	FEMALE	G3	Stage IIIA	T3	M0	N0
TCGA-DD-A1EH	1495	0	27204	470	458	26276	0	2355470	36071	45229	2274170	0	0	0.278565	1.75727	50.6466	1.72769	1.53137	23	MALE	G3	Stage III	T3	M0	N0
TCGA-2Y-A9H3	1516	0	381925	89633	19131	273161	0	41982438	6137949	2203933	33640555	0	1	0.285615	24.7063	82.4105	23.4687	14.6203	45	MALE	G1	Stage II	T2	MX	NX
TCGA-DD-AACV	1531	0	49675	1045	69	48561	0	5227843	85802	9378	5132663	0	0	0.25423	2.1066	93.8061	2.10367	1.64125	53	MALE	G3	Stage I	T1	M0	N0
TCGA-DD-AAEI	1531	0	15563	1207	80	14276	0	2066222	120776	112648	1932797	0	1	0.1996	7.79565	93.784	7.75557	5.84526	72	MALE	G2	Stage I	T1	M0	N0
TCGA-G3-A25T	1553	0	49953	2029	1709	46066	149	6870218	213530	245109	6399808	0	1	0.202366	4.21873	54.2804	4.06182	3.10805	45	FEMALE	G2	Stage IIIA	T3	M0	N0
TCGA-DD-A11D	1560	1	89204	7116	2160	79928	0	8924156	596332	258611	8069212	1	1	0.225904	8.17518	76.7141	7.97722	6.68222	57	FEMALE	G2	Stage I	T1	M0	N0
TCGA-DD-AACT	1562	0	23577	2068	593	20916	0	3179306	248666	93602	2837038	1	1	0.169554	8.99756	77.7151	8.77126	7.82139	69	FEMALE	G2	Stage I	T1	M0	N0
TCGA-DD-AACU	1567	0	72748	2322	1332	69094	0	9925013	210474	220102	9494437	1	1	0.196673	3.25137	63.5468	3.19184	2.12064	59	MALE	G3	Stage I	T1	M0	N0
TCGA-DD-A116	1622	1	88684	11321	4289	73074	0	11094856	960893	669853	9464109	1	1	0.237503	13.4143	72.524	12.7655	8.66071	68	MALE	G3	Stage IIIA	T3	M0	N0
TCGA-2Y-A9GT	1624	1	157099	7569	3213	146317	0	14425499	513639	390385	13521474	1	1	0.242655	4.91858	70.2003	4.81798	3.56063	51	MALE	G2	Stage I	T1	MX	NX
TCGA-DD-AAW3	1633	0	185804	11064	6981	167759	0	20392715	1179516	1040942	18172256	1	1	0.192189	6.18712	61.3134	5.95466	5.78401	69	MALE	G2	Stage I	T1	M0	N0
TCGA-G3-A25U	1636	0	123126	6051	928	116147	0	15358523	720142	115013	14523367	1	0	0.272438	4.9518	86.703	4.91448	4.68888	63	FEMALE	G3	Stage I	T1	M0	N0
TCGA-DD-AACC	1685	1	178003	24018	2724	151261	0	19031685	1731149	416444	16884091	1	1	0.250154	13.7027	89.8138	13.493	9.09614	61	MALE	G2	Stage I	T1	M0	N0
TCGA-DD-A39X	1694	1	234497	6401	5383	220141	2572	22427464	434740	545326	21261065	1	1	0.295085	2.82552	54.3194	2.72967	1.93843	78	FEMALE	G2	Stage I	T1	M0	NX
TCGA-DD-A4NL	1711	0	50548	3002	2060	45486	0	5168683	246022	251136	4671525	1	1	0.192424	6.19122	59.3046	5.93891	4.75986	46	MALE	G1	Stage I	T1	M0	N0
TCGA-DD-AAVX	1718	0	180465	16156	4564	159745	0	26859604	1649194	779921	24430488	1	1	0.153563	9.18471	77.973	8.95243	6.14005	38	MALE	G2	Stage II	T2	M0	N0
TCGA-2Y-A9H2	1731	0	34662	2476	1632	30554	0	4538376	206358	202702	4129314	1	1	0.201871	7.49622	60.2726	7.14327	4.54696	64	FEMALE	G3	Stage I	T1	MX	N0
TCGA-DD-AACM	1769	0	11019	259	444	10316	0	1513822	27402	76165	1410254	1	1	0.18867	2.44917	36.8421	2.35049	1.81012	48	MALE	G3	Stage II	T2	M0	N0
TCGA-G3-A25X	1779	0	46819	4741	751	41327	0	7006180	501990	105513	6398676	1	1	0.175377	10.2913	86.3256	10.1262	7.16496	73	MALE	G3	Stage II	T2	M0	N0
TCGA-NI-A4U2	1791	1	74288	10406	2968	60914	0	8137111	1152291	366350	6618470	1	1	0.167622	14.5906	77.8077	14.0076	14.1609	71	MALE	G1	Stage IIIA	T3	MX	NX
TCGA-DD-AACS	1804	0	13920	286	53	13581	0	1305937	20123	5251	1280563	0	0	0.251768	2.06245	84.3658	2.0546	1.54089	39	MALE	G3	Stage I	T1	M0	N0
TCGA-DD-AAVS	1823	0	251891	20772	9921	221198	0	29056659	1986998	1486398	25583263	1	1	0.163046	8.58454	67.6767	8.24642	6.83836	56	MALE	G2	Stage I	T1	M0	N0
TCGA-FV-A23B	1852	1	100772	3994	4778	92000	0	10421294	275470	452999	9692824	1	1	0.241645	4.16068	45.5312	3.9634	2.64334	70	FEMALE	unknow	Stage II	T2	M0	N0
TCGA-DD-AAW2	1855	0	298898	21238	14446	262861	353	41547163	1508776	1829231	38178358	1	1	0.224616	7.47556	59.5169	7.10543	3.63148	69	MALE	G2	Stage I	T1	M0	N0
TCGA-DD-AACO	1876	0	22509	2244	1640	18625	0	2510306	174805	163539	2171961	1	1	0.252406	10.7528	57.7755	9.96935	6.96349	40	MALE	G3	Stage I	T1	M0	N0
TCGA-DD-AAVZ	1900	0	286455	22849	10058	253548	0	31571439	1980950	1159519	28430970	1	1	0.181288	8.26673	69.4351	7.97647	6.2745	38	MALE	G2	Stage I	T1	M0	N0
TCGA-2Y-A9GU	1939	0	118950	15222	9569	94159	0	17847764	1136643	1117926	15593194	1	1	0.270841	13.9165	61.4013	12.797	6.36855	55	FEMALE	G2	Stage I	T1	MX	NX
TCGA-DD-AAVY	1970	0	268720	10088	5858	252774	0	34351376	1138656	864133	32348587	1	1	0.142593	3.83776	63.2635	3.75409	3.31473	56	MALE	G2	Stage IIIA	T3	M0	N0
TCGA-DD-AAW1	1989	0	191739	13806	9990	167943	0	22488516	1275142	1218628	19994744	1	1	0.180562	7.59619	58.0182	7.20041	5.67019	55	MALE	G2	Stage IIIA	T3	M0	N0
TCGA-DD-AAW0	2015	0	552297	58045	137922	356330	0	7.65546e+07	4816202	17054898	54683481	1	1	0.240361	14.0078	29.6198	10.5097	6.2912	54	MALE	G2	Stage I	T1	M0	N0
TCGA-DD-A1EB	2017	0	41028	1366	1092	38570	0	6839514	195559	169174	6474779	0	0	0.165413	3.42047	55.5736	3.32943	2.85925	72	FEMALE	G2	Stage I	T1	M0	N0
TCGA-DD-A4NV	2018	0	199551	24847	5052	169652	0	18722628	1923558	691848	16107221	1	1	0.258299	12.7749	83.1031	12.4515	10.274	61	MALE	G1	Stage IIIA	T3	M0	N0
TCGA-DD-AADR	2028	0	41421	2507	947	37967	0	3974335	213698	107876	365261	0	0	0.237671	6.1941	72.5825	6.05249	5.37695	58	MALE	G3	Stage I	T1	M0	N0
TCGA-DD-AACJ	2102	0	100474	1419	355	97856	844	9434421	111875	43843	9203337	0	0	0.23565	1.42936	79.9887	1.41231	1.18582	75	MALE	G2	Stage II	T2	M0	N0
TCGA-BC-A110	2116	1	58660	3014	1377	54269	0	8388494	302844	203592	7882057	1	1	0.199322	5.2616	68.6404	5.13808	3.61023	51	FEMALE	G1	unknow	T1	MX	NX
TCGA-DD-A3A2	2131	1	82378	2374	4059	64023	11922	12582786	297123	791502	10010042	0	0	0.147583	3.57546	36.9035	2.88184	2.36135	76	FEMALE	G1	Stage I	T1	M0	N0
TCGA-DD-AACE	2184	0	66300	2664	1757	61879	0	6602009	187776	202549	6211683	1	1	0.271729	4.12748	60.2579	4.0181	2.84423	62	MALE	G3	Stage I	T1	M0	N0
TCGA-DD-AAVU	2202	0	206935	9961	6884	185271	4819	27735358	1022767	1238678	24666685	1	1	0.21616	5.10213	59.1333	4.81359	3.68759	46	MALE	G2	Stage II	T2	M0	N0
TCGA-DD-A4ND	2232	0	69235	3608	4842	60785	0	6979480	299370	483114	6196995	0	1	0.231492	5.60309	42.6982	5.21124	4.28929	56	FEMALE	G3	Stage I	T1	M0	N0
TCGA-DD-A4NO	2245	0	183622	18771	10071	154780	0	18339205	1361052	1062985	15915168	1	1	0.276911	10.8158	65.0822	10.2226	7.42154	65	MALE	G1	Stage I	T1	M0	N0
TCGA-DD-A1ED	2301	0	51478	2896	1676	46906	0	4828146	200791	152795	4474560	1	1	0.269491	5.81503	63.3421	5.6257	4.15876	68	MALE	G1	Stage I	T1	M0	N0
TCGA-DD-AACA	2301	0	49764	4069	2094	43601	0	7455518	416091	287207	6752220	1	1	0.177427	8.53577	66.023	8.17659	5.58098	65	MALE	G3	Stage I	T1	M0	N0
TCGA-DD-AAVW	2317	0	128013	12061	6445	109415	92	19152282	1291675	962092	16884085	1	1	0.161111	9.92871	65.1735	9.4217	6.74424	35	MALE	G2	Stage I	T1	M0	N0
TCGA-DD-AACB	2324	0	58785	12452	2031	44302	0	8457258	1289248	276384	6891626	1	1	0.192489	21.9403	85.9767	21.1823	15.2443	74	FEMALE	G3	Stage I	T1	M0	N0
TCGA-ZS-A9CF	2412	0	280846	15181	6040	259618	7	34054831	1262512	1023914	31767950	0	1	0.182644	5.5244	71.5376	5.40545	3.70729	64	MALE	G2	Stage II	T2	MX	NX
TCGA-DD-A1EA	2415	0	185518	7379	9355	168784	0	22353812	709550	1267119	20377142	0	1	0.199681	4.18873	44.0959	3.97751	3.17418	68	MALE	G2	Stage II	T2	M0	N0
TCGA-DD-A113	2425	0	38845	8923	605	29271	46	2889167	486164	72716	2326341	1	1	0.33489	23.3623	93.6503	22.9708	16.8271	55	FEMALE	G3	Stage II	T2	M0	N0
TCGA-2Y-A9GX	2442	0	157558	19041	13654	124863	0	18062411	1261958	1678657	15121795	1	1	0.237098	13.2317	58.2383	12.0851	6.98665	68	MALE	G2	Stage I	T1	MX	NX
TCGA-DD-AAVV	2455	0	656589	225255	12909	418425	0	79526394	17552598	1923301	60050494	1	1	0.205469	34.9949	94.5798	34.3068	22.0714	56	MALE	G3	Stage II	T2	M0	N0
TCGA-DD-A4NS	2456	1	181316	16467	14034	132946	17869	18708634	1465144	1532029	13864553	1	1	0.226119	11.0211	53.9884	9.08193	7.83138	61	FEMALE	G2	Stage I	T1	M0	N0
TCGA-FV-A4ZP	2486	1	106206	13676	5385	87085	60	10986159	1057712	688374	9234969	0	1	0.217462	13.5727	71.7486	12.8769	9.62768	78	MALE	G2	Stage IIIA	T3	M0	NX
TCGA-DD-AAVR	2513	0	706003	163411	17070	525522	0	79536687	12751713	2454398	64330576	1	1	0.227189	23.7194	90.5419	23.1459	16.0325	44	MALE	G2	Stage I	T1	M0	N0
TCGA-2Y-A9GV	2532	1	155557	10165	4301	141091	0	14938778	917680	620324	13400773	0	1	0.225494	6.72039	70.2682	6.53458	6.14294	54	FEMALE	G1	Stage I	T1	MX	NX
TCGA-DD-A115	2542	1	101926	6927	4211	90788	0	18644817	804639	711761	17128417	1	1	0.178184	7.08898	62.1925	6.79611	4.31562	53	MALE	G2	Stage IIIA	T3	M0	N0
TCGA-DD-AAVQ	2728	0	441981	121585	9854	310542	0	42362949	8247525	1134568	32980855	1	1	0.276015	28.1364	92.503	27.5091	19.4687	38	MALE	G2	Stage I	T1	M0	N0
TCGA-DD-AAVP	2752	0	204004	10753	8325	184926	0	29160301	1099264	1315016	26746019	1	1	0.174189	5.49522	56.3634	5.27098	3.76973	48	MALE	G1	Stage I	T1	M0	N0
TCGA-DD-A1E9	2759	1	52301	3495	4635	44171	0	7706047	302742	763886	6639418	1	1	0.195894	7.33227	42.9889	6.68247	3.92863	70	MALE	G2	Stage I	T1	M0	N0
TCGA-DD-A4NP	3104	0	131928	3461	3397	123886	1184	12387522	295000	402675	11578405	0	0	0.217602	2.71777	50.4666	2.6234	2.38143	32	MALE	G3	Stage I	T1	M0	N0
TCGA-DD-A3A5	3125	1	23072	268	551	22253	0	3110869	22563	92834	2995471	0	0	0.210218	1.19	32.7228	1.16158	0.725296	66	FEMALE	G2	Stage III	T3	M0	N0
TCGA-DD-A3A6	3258	1	116000	13752	5942	93997	2309	15569801	1219505	868106	13277506	1	1	0.204445	12.763	69.8284	11.8552	7.8325	72	FEMALE	G2	Stage II	T2	M0	N0
TCGA-DD-A118	3437	0	74868	7475	2962	64359	72	9221460	597003	434019	8185380	1	1	0.205191	10.4059	71.6202	9.98424	6.47406	77	FEMALE	G2	Stage II	T2	M0	N0
TCGA-DD-A73G	3478	0	92424	2055	3907	86394	68	10960027	188015	608152	10155498	1	0	0.200837	2.32337	34.4683	2.22345	1.71546	73	FEMALE	G3	Stage I	T1	M0	N0
TCGA-2Y-A9H0	3675	0	301143	16800	3760	280536	47	28865726	1350663	593982	26917920	1	1	0.247398	5.65017	81.7121	5.57874	4.67912	49	MALE	G1	Stage IIIA	T3	M0	N0
